# Supplementary material
Source: ML conference proceedings conference paper supplement (https://proceedings.mlr.press/v157/pavan-ravishankar21a.html)
Supplement: Supplementary file 1 [file pavan-ravishankar21a-supp.pdf]

**Title:** A Causal Approach for Unfair Edge Prioritization and Discrimination Removal

## Supplementary Material

### 1. Choices for $f^{\mathbf{w}}$

We present two instances for  $f^{\mathbf{w}}$ . The list is not limited to these and can be extended as long as  $f^{\mathbf{w}}$  satisfies the constraints of the conditional probability (Eq. 9, 10).

1.  $f^{\mathbf{w}}$  is a linear combination in the inputs where,

$$f^{\mathbf{w}}(\mathbb{P}_{\text{flow}}^{pa(X)\mathbf{F}_X}(X), \bigcup_{pa(X)A \in \mathbf{U}_X} \mathbb{P}_{\text{flow}}^{pa(X)A}(X)) = w_{\mathbf{F}_X \rightarrow X} \mathbb{P}_{\text{flow}}^{pa(X)\mathbf{F}_X}(X) + \sum_{A \in \mathbf{U}_X} w_{A \rightarrow X} \mathbb{P}_{\text{flow}}^{pa(X)A}(X) \quad (22)$$

$$\text{subject to, } 0 \leq w_{\mathbf{F}_X \rightarrow X}, w_{A \rightarrow X} \leq 1, \forall A \in \mathbf{U}_X \quad (23)$$

$$w_{\mathbf{F}_X \rightarrow X} + \sum_{A \in \mathbf{U}_X} w_{A \rightarrow X} = 1 \quad (24)$$

$w_{\mathbf{F}_X \rightarrow X}$  and  $w_{A \rightarrow X}$  are constrained between 0 and 1 since the objective of the mapper  $f^{\mathbf{w}}$  is to capture the interaction between the fraction of the beliefs given by  $w_{\mathbf{F}_X \rightarrow X} \mathbb{P}_{\text{flow}}^{pa(X)\mathbf{F}_X}(X)$  and  $\bigcup_{A \in \mathbf{U}_X} w_{A \rightarrow X} \mathbb{P}_{\text{flow}}^{pa(X)A}(X)$  and approximate  $P(x|pa(X))$ . Eq. 23 and Eq. 24 ensure that the conditional probability axioms of  $f^{\mathbf{w}}$  are satisfied.

2.  $f^{\mathbf{w}} = f_N^{\mathbf{w}_N} \circ \dots \circ f_1^{\mathbf{w}_1}$  is composite function representing a N-layer neural network with  $i^{\text{th}}$  layer having  $M_i$  neurons and weights  $\mathbf{w}_i$  capturing the non-linear combination of the inputs where,

$$f^{\mathbf{w}}(\mathbb{P}_{\text{flow}}^{pa(X)\mathbf{F}_X}(x), \bigcup_{A \in \mathbf{U}_X} \mathbb{P}_{\text{flow}}^{pa(X)A}(x)) = f_N(\dots f_1(\mathbb{P}_{\text{flow}}^{pa(X)\mathbf{F}_X}(x), \bigcup_{A \in \mathbf{U}_X} \mathbb{P}_{\text{flow}}^{pa(X)A}(x))) \quad (25)$$

$$\text{subject to, } f_i : \mathbb{R}^{M_i} \rightarrow [0, 1]^{|X|}, \quad (26)$$

$$\sum_x f^{\mathbf{w}}(\mathbb{P}_{\text{flow}}^{pa(X)\mathbf{F}_X}(x), \bigcup_{A \in \mathbf{U}_X} \mathbb{P}_{\text{flow}}^{pa(X)A}(x)) = 1 \quad (27)$$

$f^{\mathbf{w}}$  captures the interaction between  $\mathbb{P}_{\text{flow}}^{pa(X)\mathbf{F}_X}(x)$  and  $\bigcup_{A \in \mathbf{U}_X} \mathbb{P}_{\text{flow}}^{pa(X)A}(x)$  and models  $P(x|pa(X))$ . Eq. 26 and Eq. 27 ensure that the conditional probability axioms of  $f^{\mathbf{w}}$  are satisfied. One possibility is to use a softmax function for  $f_N$  to ensure that the outputs of  $f^{\mathbf{w}}$  satisfy probability axioms.

## 2. Proof of Theorem 12 & Corollary 13

### Proof of Theorem 12

$$C_{\mathbf{S}=\mathbf{s}, Y=y} \quad (28)$$

$$= \sum_{s' \in \mathbf{S} \setminus \mathbf{s}} TE_{Y=y}(\mathbf{s}, \mathbf{s}') \mathbb{P}(\mathbf{s}') \quad (29)$$

$$= \sum_{s' \in \mathbf{S} \setminus \mathbf{s}} [\mathbb{P}(y|do(\mathbf{s})) - \mathbb{P}(y|do(\mathbf{s}'))] \mathbb{P}(\mathbf{s}') \quad (30)$$

$$= \sum_{s' \in \mathbf{S} \setminus \mathbf{s}} \mathbb{P}(\mathbf{s}') \left[ \sum_{\mathbf{v}_1 \in \mathbf{V} \setminus Y} \mathbb{P}(\mathbf{v}_1, y|do(\mathbf{s})) - \sum_{\mathbf{v}_2 \in \mathbf{V} \setminus Y} \mathbb{P}(\mathbf{v}_2, y|do(\mathbf{s}')) \right]$$

$[\mathbf{v}_1 \text{ is consistent with } \mathbf{s} \text{ and } \mathbf{v}_2 \text{ is consistent with } \mathbf{s}']$  (31)

$$= \sum_{s' \in \mathbf{S} \setminus \mathbf{s}} \mathbb{P}(\mathbf{s}') \left[ \sum_{\mathbf{v} \in \mathbf{V} \setminus \{\mathbf{S}, Y\}} \prod_{V \in \mathbf{V} \setminus \{\mathbf{S}, Y\}, Y=y} \mathbb{P}(v|pa(V))|_{\mathbf{s}} - \sum_{\mathbf{v} \in \mathbf{V} \setminus \{\mathbf{S}, Y\}} \prod_{V \in \mathbf{V} \setminus \{\mathbf{S}, Y\}, Y=y} \mathbb{P}(v|pa(V))|_{\mathbf{s}'} \right]$$

[Definition 3] (32)

$$= \sum_{s' \in \mathbf{S} \setminus \mathbf{s}} \mathbb{P}(\mathbf{s}') \left[ \sum_{\mathbf{v} \in \mathbf{V} \setminus \{\mathbf{S}, Y\}} \prod_{V \in \mathbf{V} \setminus \{\mathbf{S}, Y\}, Y=y} f_V(\mathbb{P}_{\text{flow}}^{pa(V)\mathbf{F}_V}(v), \bigcup_{A \in \mathbf{U}_V} \mathbb{P}_{\text{flow}}^{\mathbf{s}_A \vee pa(V)_A}(v)) - \sum_{\mathbf{v} \in \mathbf{V} \setminus \{\mathbf{S}, Y\}} \prod_{V \in \mathbf{V} \setminus \{\mathbf{S}, Y\}, Y=y} f_V(\mathbb{P}_{\text{flow}}^{pa(V)\mathbf{F}_V}(v), \bigcup_{A \in \mathbf{U}_V} \mathbb{P}_{\text{flow}}^{\mathbf{s}'_A \vee pa(V)_A}(v)) \right]$$

[Theorem 10 and Notation 18] (33)

$$\leq \sum_{s' \in \mathbf{S} \setminus \mathbf{s}} \mathbb{P}(\mathbf{s}') \left[ \sum_{\mathbf{v} \in \mathbf{V} \setminus \{\mathbf{S}, Y\}} \prod_{V \in \mathbf{V} \setminus \{\mathbf{S}, Y\}, Y=y} [f_V(\mathbb{P}_{\text{flow}}^{pa(V)\mathbf{F}_V}(v), \bigcup_{A \in \mathbf{U}_V \setminus B} \mathbb{P}_{\text{flow}}^{\mathbf{s}_A \vee pa(V)_A}(v), \mathbb{P}_{\text{flow}}^{\mathbf{s}_B \vee pa(V)_B}(v) = 0) + \frac{\mathbb{P}_{\text{flow}}^{\mathbf{s}_B \vee pa(V)_B}(v)}{\mathbb{P}(v, pa(V))|_{\mathbf{s}}} \mu_{B \rightarrow V}] - \sum_{\mathbf{v} \in \mathbf{V} \setminus \{\mathbf{S}, Y\}} \prod_{V \in \mathbf{V} \setminus \{\mathbf{S}, Y\}, Y=y} [f_V(\mathbb{P}_{\text{flow}}^{pa(V)\mathbf{F}_V}(v), \bigcup_{A \in \mathbf{U}_V \setminus B} \mathbb{P}_{\text{flow}}^{\mathbf{s}'_A \vee pa(V)_A}(v), \mathbb{P}_{\text{flow}}^{\mathbf{s}'_B \vee pa(V)_B}(v) = 0) - \frac{\mathbb{P}_{\text{flow}}^{\mathbf{s}'_B \vee pa(V)_B}(v)}{\mathbb{P}(v, pa(V))|_{\mathbf{s}'}} \mu_{B \rightarrow V}] \right]$$

[Definition 12, property that  $|\cdot| \geq 0$ , and Notation 18] (34)

$$\leq \sum_{s' \in \mathbf{S} \setminus \mathbf{s}} \mathbb{P}(\mathbf{s}') \left[ \sum_{\mathbf{v} \in \mathbf{V} \setminus \{\mathbf{S}, Y\}} \prod_{V \in \mathbf{V} \setminus \{\mathbf{S}, Y\}, Y=y} [f_V(\mathbb{P}_{\text{flow}}^{pa(V)\mathbf{F}_V}(v), \bigcup_{A \in \mathbf{U}_V} \mathbb{P}_{\text{flow}}^{\mathbf{s}_A \vee pa(V)_A}(v) = 0) + \sum_{A \in \mathbf{U}_V} \frac{\mathbb{P}_{\text{flow}}^{\mathbf{s}_A \vee pa(V)_A}(v)}{\mathbb{P}(v, pa(V))|_{\mathbf{s}}} \mu_{A \rightarrow V}] - \sum_{\mathbf{v}_2 \in \mathbf{V} \setminus \{\mathbf{S}, Y\}} \prod_{V \in \mathbf{V} \setminus \{\mathbf{S}, Y\}, Y=y} [f_V(\mathbb{P}_{\text{flow}}^{pa(V)\mathbf{F}_V}(v), \bigcup_{A \in \mathbf{U}_V} \mathbb{P}_{\text{flow}}^{\mathbf{s}'_A \vee pa(V)_A}(v) = 0) - \sum_{A \in \mathbf{U}_V} \frac{\mathbb{P}_{\text{flow}}^{\mathbf{s}'_A \vee pa(V)_A}(v)}{\mathbb{P}(v, pa(V))|_{\mathbf{s}'}} \mu_{A \rightarrow V}] \right]$$

[Recursively apply previous step for every  $A \in \mathbf{U}_V$  and Notation 18] (35)

$$\begin{aligned}
 &\leq \sum_{\mathbf{s}' \in \mathbf{S} \setminus \mathbf{s}} \mathbb{P}(\mathbf{s}') \left[ \sum_{\mathbf{v} \in \mathbf{V} \setminus \{\mathbf{S}, Y\}} \prod_{V \in \mathbf{V} \setminus \{\mathbf{S}, Y\}, Y=y} \sum_{A \in \mathbf{U}_V} \frac{\mathbb{P}_{\text{flow}}^{\mathbf{S}'_A \vee pa(V)_A}(v)}{\mathbb{P}(v, pa(V))|_{\mathbf{s}}} \mu_{A \rightarrow V} + \right. \\
 &\quad \left. \sum_{\mathbf{v} \in \mathbf{V} \setminus \{\mathbf{S}, Y\}} \prod_{V \in \mathbf{V} \setminus \{\mathbf{S}, Y\}, Y=y} \sum_{A \in \mathbf{U}_V} \frac{\mathbb{P}_{\text{flow}}^{\mathbf{S}'_A \vee pa(V)_A}(v)}{\mathbb{P}(v, pa(V))|_{\mathbf{s}'}} \mu_{A \rightarrow V} \right] \quad (36)
 \end{aligned}$$

$$\leq \sum_{\mathbf{s}' \in \mathbf{S} \setminus \mathbf{s}} \mathbb{P}(\mathbf{s}') \left[ \sum_{\mathbf{v} \in \mathbf{V} \setminus \{\mathbf{S}, Y\}} \prod_{V \in \mathbf{V} \setminus \{\mathbf{S}, Y\}, Y=y} \sum_{A \in \mathbf{U}_V} \left[ \frac{\mathbb{P}_{\text{flow}}^{\mathbf{S}'_A \vee pa(V)_A}(v)}{\mathbb{P}(v, pa(V))|_{\mathbf{s}}} + \frac{\mathbb{P}_{\text{flow}}^{\mathbf{S}'_A \vee pa(V)_A}(v)}{\mathbb{P}(v, pa(V))|_{\mathbf{s}'}} \right] \mu_{A \rightarrow V} \right] \quad (37)$$

Thus,

$$C_{\mathbf{S}=\mathbf{s}, Y=y} \leq C_{\mathbf{S}=\mathbf{s}, Y=y}^{\text{upper}} \quad [\text{From Eq. 37 and Eq. 17}] \quad (38)$$

$$C_{\mathbf{S}=\mathbf{s}, Y=y} \geq -C_{\mathbf{S}=\mathbf{s}, Y=y}^{\text{upper}} \quad [\text{Similar proof}] \quad (39)$$

$$\therefore |C_{\mathbf{S}=\mathbf{s}, Y=y}| \leq C_{\mathbf{S}=\mathbf{s}, Y=y}^{\text{upper}} \quad \blacksquare \quad (40)$$

### Proof of Corollary 13

When edge unfairness  $\mu_{e, \mathbb{G}} = 0$ ,  $\forall e$  from  $\mathbf{S}$ ,

$$\begin{aligned}
 C_{\mathbf{S}=\mathbf{s}, Y=y}^{\text{upper}} &= 0 \\
 [\text{Edge unfairness } \mu_{e, \mathbb{G}} = 0 \forall e \text{ from } \mathbf{S} \text{ and Eq. 17}] & \quad (41)
 \end{aligned}$$

$$\begin{aligned}
 C_{\mathbf{S}=\mathbf{s}, Y=y} &= 0 \\
 [\text{Eq. 40 and Eq. 41}] & \quad \blacksquare \quad (42)
 \end{aligned}$$

## 3. Experiments - Additional Details

The values taken by each of the node in the causal graph 1 are shown in Table 1.

### 3.1 Edge Unfairness is an Edge Property

We investigate that the edge unfairness depends on the parameters of the edge and not on the specific values of the attributes.

**Inference:** When a linear model is used,  $\mathbf{w}^*$  is observed to be insensitive to the specific values taken by the nodes as there is minimal variation in  $\mathbf{w}_e^*$  for any fixed  $\theta_e$  as shown in Fig. 5(a).  $w_{R \rightarrow J}^*$  was observed to be in the range  $[0.2, 0.3]$  for different  $\theta_{R \rightarrow J}$ . A small

Table 1: Nodes and their Values.

| Node              | Values                                         |
|-------------------|------------------------------------------------|
| Race $R$          | African American(0), Hispanic(1) and White(2)  |
| Gender $G$        | Male(0), Female(1) and Others(2)               |
| Age $A$           | Old (0)( $>35y$ ) and Young (1) ( $\leq 35y$ ) |
| Literacy $L$      | Literate (0) and Illiterate (1)                |
| Employment $E$    | Not Employed (0) and Employed (1)              |
| Bail Decision $J$ | Bail granted (0) and Bail rejected (1)         |
| Case History $C$  | Strong (0) and Weak criminal history (1)       |

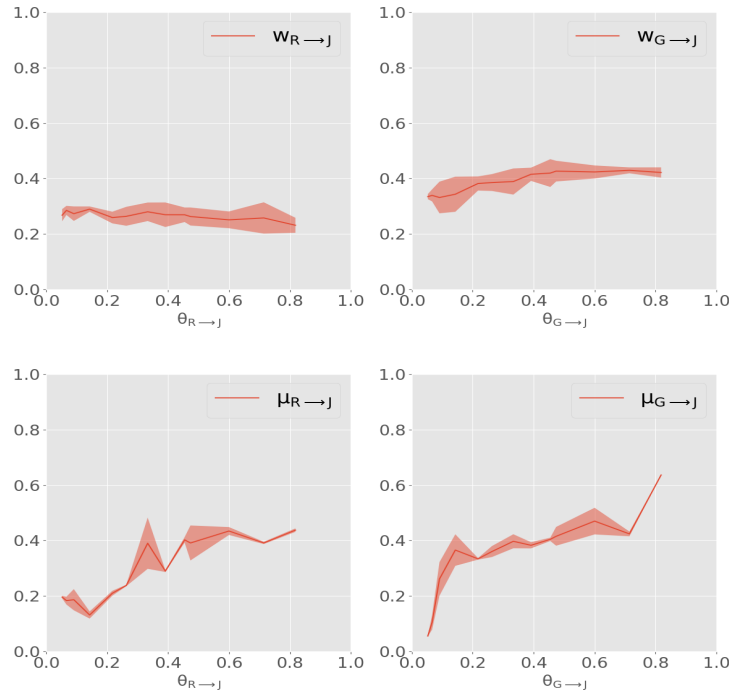

Figure 5: Edge unfairness is a property of the edge because there is minimal variation in edge unfairness for a specific  $\theta_e$ . (a)  $w_{R \rightarrow J}^*$  vs.  $\theta_{R \rightarrow J}$  and  $w_{G \rightarrow J}^*$  vs.  $\theta_{G \rightarrow J}$  for linear model. (b)  $\mu_{R \rightarrow J}$  vs.  $\theta_{R \rightarrow J}$  and  $\mu_{G \rightarrow J}$  vs.  $\theta_{G \rightarrow J}$  for non-linear model.

deviation in  $w_{R \rightarrow J}^*$  shows that  $w_{R \rightarrow J}^*$  depends only on  $\theta_{R \rightarrow J}$  and not on the specific values taken by the nodes. Since edge unfairness in an edge, say  $R \rightarrow J$ , is  $\mu_{R \rightarrow J} = |Pa(J)|w_{R \rightarrow J}$  in the linear model setting, it indicates that edge unfairness is also insensitive to the specific values taken by nodes and hence is a property of the edge. Similarly for the non-linear model, edge unfairness  $\mu_e$  is insensitive to the specific values taken by the nodes as there is minimal variation in  $\mu_e$  for any fixed  $\theta_e$  as observed from Fig. 5(b). For instance,  $\mu_{R \rightarrow J}$  obtained in the models with  $\theta_{R \rightarrow J} = 0.5$  are in the range  $[0.35, 0.43]$ . A similar observation

can be made for  $w_{G \rightarrow J}^*$  and  $\mu_{G \rightarrow J}$  in Fig. 5(a) and 5(b) respectively. We also analyze the  $MSE$  for both the linear and non-linear settings in Supplementary material.

### 3.2 Linear and Non-linear model comparison

To validate the benefits of a non-linear model, the  $MSE$ s between the  $CPT$ s for bail decision  $\mathbb{P}(J|Pa(J))$  and its functional approximation  $f^{\mathbf{w}}$  were recorded for these settings:

1.  $MSE$ s  $e_J^L$  calculated when  $f^{\mathbf{w}}$  is approximated using a linear model (Eq. 22)
2.  $MSE$ s  $e_J^{NL}$  calculated when  $f^{\mathbf{w}}$  is approximated using a non-linear model (Eq. 25)

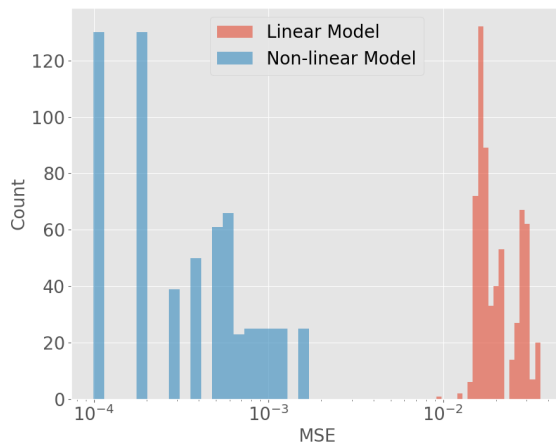

Figure 6: Histogram for  $MSE$  by using a linear model shown in red and using a non-linear model shown in blue for 625 different models (discussed in Section 5.1).

**Inference:** Distributions of  $e_J^L$  and  $e_J^{NL}$  are plotted in Fig. 6. Here, the maximum value of  $e_J^L$  shown in the red bar is obtained above 0.01 and its values mostly lie in the range (0.01, 0.02). On the other hand,  $e_J^{NL}$  shown in blue bars is distributed in the range (0.0001, 0.001) with the maximum value of  $e_J^{NL}$  obtained around 0.002. Hence, a non-linear model like a neural network to approximate  $f^{\mathbf{w}}$  is a better choice because the  $MSE$ s distribution lies in the lower error range.
